# Supplementary material
Source: publisher figshare collection journal article supplement (https://asha.figshare.com/articles/dataset/_/20277714)
Supplement: Supplementary file 1 [file 1]

## Supplemental Material S2. Summary of overall study quality.

| Manuscript   |      | Weighted Scores   |                   |                 | Rank |
|--------------|------|-------------------|-------------------|-----------------|------|
| Author       | Year | Internal Validity | External Validity | Overall Quality |      |
| O'Shaugnessy | 1997 | 31                | 35                | 66              | 1    |
| Torgesen     | 1999 | 31                | 33                | 64              | 2    |
| Gillam       | 2008 | 32                | 30                | 62              | 3    |
| Loeb         | 2009 | 25                | 36                | 61              | 4    |
| Ritter       | 2013 | 28                | 30                | 58              | 5    |
| Lane         | 2007 | 26                | 32                | 58              | 5    |
| Korkman      | 1993 | 20                | 38                | 58              | 5    |
| Troia        | 2003 | 21                | 36                | 57              | 6    |
| Wise         | 2016 | 23                | 34                | 57              | 6    |
| Gillon       | 2000 | 21                | 35                | 56              | 7    |
| Bowyer-Crane | 2008 | 25                | 31                | 56              | 7    |
| Pullen       | 2014 | 28                | 28                | 56              | 7    |
| Ukrainetz    | 2009 | 29                | 25                | 54              | 8    |
| Kyle         | 2013 | 28                | 26                | 54              | 8    |
| Pokorni      | 2004 | 22                | 32                | 54              | 8    |
| McMaster     | 2005 | 29                | 25                | 54              | 8    |
| Al Otaiba    | 2005 | 21                | 33                | 54              | 8    |
| Mathes       | 2001 | 24                | 30                | 54              | 8    |
| Hatcher      | 2004 | 25                | 28                | 53              | 9    |
| Olson        | 1997 | 27                | 26                | 53              | 9    |
| Calhoon      | 2007 | 23                | 30                | 53              | 9    |
| Hatcher      | 1994 | 20                | 33                | 53              | 9    |
| Gillon       | 2007 | 26                | 27                | 53              | 9    |
| Torgeson     | 2010 | 26                | 27                | 53              | 9    |
| Trainin      | 2014 | 34                | 19                | 53              | 9    |
| Biancone     | 2018 | 23                | 29                | 52              | 10   |
| Senechal     | 2012 | 28                | 24                | 52              | 10   |
| Fives        | 2013 | 26                | 25                | 51              | 11   |
| Barker       | 1993 | 22                | 29                | 51              | 11   |
| Simmons      | 2007 | 32                | 19                | 51              | 11   |
| Jiménez      | 2003 | 20                | 31                | 51              | 11   |
| Solari       | 2018 | 24                | 27                | 51              | 11   |
| Li           | 2018 | 23                | 28                | 51              | 11   |
| Nelson       | 2005 | 24                | 26                | 50              | 12   |
| Segers       | 2004 | 26                | 24                | 50              | 12   |
| Regtvoort    | 2007 | 16                | 34                | 50              | 12   |
| Zoski        | 2015 | 30                | 20                | 50              | 12   |
| O'Connor     | 2010 | 27                | 22                | 49              | 13   |
| Yeh          | 2008 | 30                | 19                | 49              | 13   |
| Nutkins      | 2004 | 22                | 27                | 49              | 13   |
| Lane         | 2009 | 27                | 22                | 49              | 13   |
| Wolff        | 2014 | 17                | 32                | 49              | 13   |
| Ehri         | 2007 | 19                | 30                | 49              | 13   |
| Vadasy       | 2000 | 22                | 27                | 49              | 13   |
| Given        | 2008 | 25                | 23                | 48              | 14   |

| Manuscript        |       | Weighted Scores   |                   |                 | Rank |
|-------------------|-------|-------------------|-------------------|-----------------|------|
| Author            | Year  | Internal Validity | External Validity | Overall Quality |      |
| Bjorn             | 2013  | 21                | 27                | 48              | 14   |
| Vadasy            | 2006  | 22                | 26                | 48              | 14   |
| Layes             | 2020  | 23                | 25                | 48              | 14   |
| Hatcher           | 2006  | 23                | 25                | 48              | 14   |
| Lonigan           | 2013  | 26                | 22                | 48              | 14   |
| Mitchell          | 2001  | 22                | 26                | 48              | 14   |
| Lonigan           | 2016  | 23                | 24                | 47              | 15   |
| Epstein           | 1994  | 18                | 29                | 47              | 15   |
| van Otterloo      | 2009  | 16                | 31                | 47              | 15   |
| Yeh               | 2003  | 28                | 19                | 47              | 15   |
| Balbi             | 2020  | 18                | 29                | 47              | 15   |
| Fricke            | 2013  | 20                | 27                | 47              | 15   |
| Solari            | 2008  | 29                | 18                | 47              | 15   |
| Schwartz          | 2005  | 15                | 32                | 47              | 15   |
| Wise              | 1999  | 22                | 25                | 47              | 15   |
| Wise              | 2000  | 23                | 24                | 47              | 15   |
| MacKay            | 2011  | 22                | 24                | 46              | 16   |
| Vaughn            | 2006  | 22                | 24                | 46              | 16   |
| Travis            | 1997  | 25                | 21                | 46              | 16   |
| Plasencia-Peinado | 1999  | 18                | 28                | 46              | 16   |
| Gillon            | 2005  | 22                | 24                | 46              | 16   |
| Foorman           | 1998  | 21                | 25                | 46              | 16   |
| Benner            | 2003  | 21                | 24                | 45              | 17   |
| Lonigan           | 2003  | 16                | 29                | 45              | 17   |
| Ryder             | 2008  | 16                | 29                | 45              | 17   |
| Adnams            | 2007  | 16                | 29                | 45              | 17   |
| Allor             | 2004  | 18                | 27                | 45              | 17   |
| Scanlon           | 2008  | 17                | 28                | 45              | 17   |
| Whittaker         | 2013  | 16                | 29                | 45              | 17   |
| Warren            | 2009  | 24                | 21                | 45              | 17   |
| Wang              | 2000  | 20                | 24                | 44              | 18   |
| Pindiprolu        | 2020  | 29                | 15                | 44              | 18   |
| Carson            | 2019b | 16                | 27                | 43              | 19   |
| Hagans            | 2013  | 20                | 23                | 43              | 19   |
| Weiner            | 1994  | 21                | 22                | 43              | 19   |
| Fukuda            | 2013  | 19                | 24                | 43              | 19   |
| Elbro             | 2004  | 12                | 31                | 43              | 19   |
| Wise              | 2015  | 20                | 22                | 42              | 20   |
| Hadley            | 2000  | 15                | 27                | 42              | 20   |
| Milburn           | 2017  | 18                | 24                | 42              | 20   |
| Vaughn            | 2006  | 18                | 24                | 42              | 20   |
| Wolff             | 2011  | 23                | 19                | 42              | 20   |
| Lo                | 2009  | 17                | 25                | 42              | 20   |
| Baugh             | 2005  | 23                | 19                | 42              | 20   |
| Mirbازل           | 2016  | 19                | 22                | 41              | 21   |
| Vadasy            | 1997  | 17                | 24                | 41              | 21   |
| Poskiparta        | 1999  | 15                | 26                | 41              | 21   |

| Manuscript     |      | Weighted Scores   |                   |                 | Rank |
|----------------|------|-------------------|-------------------|-----------------|------|
| Author         | Year | Internal Validity | External Validity | Overall Quality |      |
| DeBaryshe      | 2007 | 16                | 24                | 40              | 22   |
| Ukrainetz      | 2000 | 20                | 20                | 40              | 22   |
| Vanderwood     | 2014 | 16                | 24                | 40              | 22   |
| Hindson        | 2005 | 15                | 25                | 40              | 22   |
| Torgeson       | 1997 | 20                | 20                | 40              | 22   |
| Carson         | 2019 | 16                | 24                | 40              | 22   |
| Hecht          | 2002 | 18                | 22                | 40              | 22   |
| Anderson       | 2010 | 21                | 19                | 40              | 22   |
| Helf           | 2014 | 15                | 24                | 39              | 23   |
| Kerins         | 2010 | 17                | 22                | 39              | 23   |
| Gonzalez       | 2002 | 14                | 25                | 39              | 23   |
| Leafstedt      | 2004 | 20                | 18                | 38              | 24   |
| Bingham        | 2010 | 18                | 20                | 38              | 24   |
| Van Kleeck     | 1998 | 15                | 22                | 37              | 25   |
| Nancollis      | 2005 | 10                | 27                | 37              | 25   |
| Pietrangelo    | 1999 | 17                | 19                | 36              | 26   |
| Kembert        | 2016 | 15                | 21                | 36              | 26   |
| Kartal         | 2016 | 18                | 18                | 36              | 26   |
| Duff           | 2012 | 11                | 24                | 35              | 27   |
| Seward         | 2009 | 13                | 22                | 35              | 27   |
| Iverson        | 1993 | 13                | 22                | 35              | 27   |
| Flis           | 2018 | 15                | 19                | 34              | 28   |
| Foy            | 2009 | 15                | 19                | 34              | 28   |
| Crespo         | 2018 | 15                | 19                | 34              | 28   |
| Wheldall       | 2016 | 21                | 13                | 34              | 28   |
| Lennox         | 2018 | 16                | 18                | 34              | 28   |
| Layne          | 1997 | 17                | 17                | 34              | 28   |
| Schneider      | 1999 | 10                | 24                | 34              | 28   |
| Raisor         | 2006 | 14                | 19                | 33              | 29   |
| Chera          | 2003 | 15                | 18                | 33              | 29   |
| Rule           | 2006 | 22                | 11                | 33              | 29   |
| Bode           | 2011 | 12                | 21                | 33              | 29   |
| Falth          | 2017 | 11                | 22                | 33              | 29   |
| Brady          | 1994 | 6                 | 27                | 33              | 29   |
| Linan-Thompson | 2005 | 11                | 21                | 32              | 30   |
| Hempenstall    | 2008 | 13                | 18                | 31              | 31   |
| Compton        | 2000 | 11                | 20                | 31              | 31   |
| Innes          | 2020 | 18                | 12                | 30              | 32   |
| Stevens        | 2008 | 18                | 12                | 30              | 32   |
| Howell         | 2000 | 16                | 13                | 29              | 33   |
| Warrick        | 1993 | 15                | 14                | 29              | 33   |
| Schneider      | 2000 | 16                | 13                | 29              | 33   |
| Kartal         | 2016 | 17                | 11                | 28              | 34   |
| Makhoul        | 2017 | 12                | 15                | 27              | 35   |
| Olofsson       | 1985 | 12                | 12                | 24              | 36   |
| O'Connor       | 2009 | 3                 | 0                 | 3               | 38   |
