# Supplementary material
Source: publisher figshare collection journal article supplement (https://asha.figshare.com/articles/dataset/_/20277714)
Supplement: Supplementary file 2 [file 1]

## Supplemental Material S1. Studies included for review.

| Manuscript   |       |      |        |     |         | Intervention |             |
|--------------|-------|------|--------|-----|---------|--------------|-------------|
| Author       | Year  | ID   | Format | N   | Age (M) | Type         | Comparison  |
| Adnams       | 2007  | 857  | A      | 36  | 9.58    | Phono+       | Control     |
| Al Otaiba    | 2005  | 1584 | A      | 73  | 5.60    | Phono+       | Both        |
| Allor        | 2004  | 876  | A      | 157 | 6.57    | Phono+       | Control     |
| Anderson     | 2010  | 982  | D      | 61  | 4.50    | Phono+       | Alternative |
| Balbi        | 2020  | 574  | A      | 125 | 7.04    | Phono+       | Control     |
| Barker       | 1993  | 149  | D      | 54  | 7.33    | Phoneme      | Both        |
| Baugh        | 2005  | 1392 | D      | 100 |         | Phoneme+     | Alternative |
| Benner       | 2003  | 179  | D      | 36  | 5.70    | Phono+       | Control     |
| Biancone     | 2018  | 1415 | D      | 102 | 4.40    | Phono        | Control     |
| Bingham      | 2010  | 1331 | A      | 63  |         | Phono        | Control     |
| Bjorn        | 2013  | 103  | A      | 24  |         | Phono        | Control     |
| Bode         | 2011  | 1037 | A      | 307 | 5.58    | Phoneme      | Control     |
| Bowyer-Crane | 2008  | 774  | A      | 137 | 4.75    | Phono        | Alternative |
| Brady        | 1994  | 1574 | A      | 42  | 5.33    | Phoneme+     | Control     |
| Calhoon      | 2007  | 524  | A      | 76  | 6.54    | Phono+       | Control     |
| Carson       | 2019b | 260  | A      | 23  | 5.43    | Phono+       | Control     |
| Carson       | 2019  | 515  | A      | 24  | 4.75    | Phono+       | Control     |
| Chera        | 2003  | 188  | A      | 75  | 4.08    | Phoneme      | Control     |
| Compton      | 2000  | 943  | A      | 41  | 6.56    | Phono+       | Control     |
| Crespo       | 2018  | 396  | A      | 530 | 6.31    | Phono        | Control     |
| DeBaryshe    | 2007  | 164  | A      | 81  | 3.93    | Phono+       | Control     |
| Duff         | 2012  | 618  | A      | 59  | 6.17    | Phono        | Control     |
| Ehri         | 2007  | 1205 | A      | 126 | 6.23    | Phono        | Alternative |
| Elbro        | 2004  | 909  | A      | 82  | 6.17    | Phoneme+     | Control     |
| Epstein      | 1994  | 105  | D      | 167 | 4.42    | Phono+       | Control     |
| Falth        | 2017  | 1055 | A      | 27  | 6.00    | Phono+       | Control     |
| Fives        | 2013  | 61   | A      | 229 | 6.58    | Phono+       | Control     |
| Flis         | 2018  | 102  | D      | 82  | 6.38    | Phono        | Control     |
| Foorman      | 1998  | 1523 | A      | 133 |         | Phono+       | Both        |
| Foy          | 2009  | 142  | A      | 76  |         | Phono+       | Control     |
| Fricke       | 2013  | 578  | A      | 164 | 4.00    | Phono+       | Control     |
| Fukuda       | 2013  | 628  | D      | 66  |         | Phoneme+     | Control     |
| Gillam       | 2008  | 1444 | A      | 162 | 7.50    | Phoneme+     | Both        |
| Gillon       | 2000  | 682  | A      | 61  | 6.12    | Phono        | Both        |
| Gillon       | 2007  | 1056 | A      | 20  | 6.39    | Phono+       | Alternative |
| Gillon       | 2005  | 1445 | A      | 22  | 6.00    | Phoneme+     | Control     |

| Manuscript     |      |      |        |     |         | Intervention |             |
|----------------|------|------|--------|-----|---------|--------------|-------------|
| Author         | Year | ID   | Format | N   | Age (M) | Type         | Comparison  |
| Given          | 2008 | 77   | A      | 39  | 12.53   | Phono+       | Both        |
| Gonzalez       | 2002 | 1227 | A      | 52  | 9.79    | Phono+       | Both        |
| Hadley         | 2000 | 284  | A      | 22  | 5.75    | Phono        | Control     |
| Hagans         | 2013 | 361  | A      | 50  |         | Phono+       | Control     |
| Hatcher        | 2004 | 131  | A      | 304 | 4.67    | Phono        | Both        |
| Hatcher        | 1994 | 579  | A      | 93  | 7.49    | Phoneme      | Both        |
| Hatcher        | 2006 | 666  | A      | 77  | 5.50    | Phono+       | Alternative |
| Hecht          | 2002 | 590  | A      | 76  | 5.58    | Phono+       | Control     |
| Helf           | 2014 | 118  | A      | 303 |         | Phono+       | Control     |
| Hempenstall    | 2008 | 344  | A      | 206 | 9.70    | Phono+       | Control     |
| Hindson        | 2005 | 213  | A      | 86  |         | Phono        | Control     |
| Howell         | 2000 | 626  | A      | 60  |         | Phono        | Control     |
| Innes          | 2020 | 681  | D      | 48  | 4.00    | Phoneme      | Both        |
| Iverson        | 1993 | 1073 | A      | 96  | 6.17    | Phono+       | Both        |
| Jiménez        | 2003 | 409  | A      | 59  | 8.74    | Phoneme      | Control     |
| Kartal         | 2016 | 383  | A      | 60  | 5.74    | Phoneme+     | Both        |
| Kartal         | 2016 | 1570 | A      | 20  | 5.21    | Phono        | Control     |
| Kembert        | 2016 | 1569 | A      | 424 | 4.57    | Phono        | Both        |
| Kerins         | 2010 | 538  | A      | 23  | 6.42    | Phoneme+     | Control     |
| Korkman        | 1993 | 1667 | A      | 46  | 6.12    | Phoneme+     | Control     |
| Kyle           | 2013 | 212  | A      | 30  | 5.83    | Phoneme+     | Both        |
| Lane           | 2009 | 751  | A      | 60  |         | Phono+       | Both        |
| Lane           | 2007 | 980  | A      | 24  | 6.59    | Phoneme      | Control     |
| Layes          | 2020 | 310  | A      | 44  | 10.27   | Phono        | Control     |
| Layne          | 1997 | 740  | D      | 16  | 7.62    | Phoneme+     | Control     |
| Leafstedt      | 2004 | 513  | A      | 62  |         | Phoneme      | Control     |
| Lennox         | 2018 | 620  | A      | 137 | 5.10    | Phono        | Control     |
| Li             | 2018 | 1266 | A      | 87  | 9.97    | Phoneme      | Control     |
| Linan-Thompson | 2005 | 1287 | A      | 40  | 5.77    | Phono        | Control     |
| Lo             | 2009 | 656  | A      | 47  |         | Phono+       | Both        |
| Loeb           | 2009 | 1421 | A      | 74  | 7.42    | Phoneme      | Both        |
| Lonigan        | 2016 | 31   | A      | 132 | 4.85    | Phono+       | Control     |
| Lonigan        | 2003 | 616  | A      | 41  | 4.59    | Phoneme      | Control     |
| Lonigan        | 2013 | 1240 | A      | 203 | 4.53    | Phono+       | Both        |
| MacKay         | 2011 | 211  | D      | 100 | 5.35    | Phono        | Both        |
| Makhoul        | 2017 | 952  | A      | 206 |         | Phono        | Alternative |
| Mathes         | 2001 | 1670 | A      | 68  | 6.44    | Phoneme+     | Both        |
| McMaster       | 2005 | 1237 | A      | 56  |         | Phono        | Both        |

| Manuscript        |      |      |        |     |         | Intervention |             |
|-------------------|------|------|--------|-----|---------|--------------|-------------|
| Author            | Year | ID   | Format | N   | Age (M) | Type         | Comparison  |
| Milburn           | 2017 | 373  | A      | 181 | 4.86    | Phono+       | Control     |
| Mirbazer          | 2016 | 1390 | A      | 60  | 12.50   | Phoneme+     | Control     |
| Mitchell          | 2001 | 1417 | A      | 72  | 6.34    | Phoneme      | Both        |
| Nancollis         | 2005 | 1043 | A      | 213 | 4.54    | Phono        | Control     |
| Nelson            | 2005 | 176  | A      | 36  | 5.70    | Phono        | Control     |
| Nutkins           | 2004 | 649  | D      | 55  | 4.63    | Phoneme      | Both        |
| O'Connor          | 2010 | 30   | A      | 69  |         | Phono+       | Control     |
| O'Connor          | 2009 | 1021 | A      | 54  | 6.67    | Phono        | Control     |
| O'Shaugnessy      | 1997 | 1245 | D      | 45  | 7.67    | Phono+       | Both        |
| Olofsson          | 1985 | 631  | A      | 83  | 6.92    | Phoneme+     | Control     |
| Olson             | 1997 | 330  | A      | 103 | 8.97    | Phono+       | Alternative |
| Pietrangelo       | 1999 | 976  | D      | 129 |         | Phono        | Control     |
| Pindiprolu        | 2020 | 1146 | A      | 20  |         | Phono        | Alternative |
| Plasencia-Peinado | 1999 | 648  | D      | 102 |         | Phono        | Both        |
| Pokorni           | 2004 | 1047 | A      | 38  | 8.72    | Phoneme+     | Alternative |
| Poskiparta        | 1999 | 1644 | A      | 30  | 7.13    | Phoneme      | Control     |
| Pullen            | 2014 | 1338 | A      | 100 |         | Phoneme+     | Both        |
| Raisor            | 2006 | 20   | D      | 44  | 3.50    | Phoneme      | Both        |
| Regtvoort         | 2007 | 459  | A      | 57  | 5.81    | Phono+       | Control     |
| Ritter            | 2013 | 63   | A      | 64  | 7.77    | Phono        | Control     |
| Rule              | 2006 | 725  | A      | 34  |         | Phono        | Both        |
| Ryder             | 2008 | 665  | A      | 24  | 6.71    | Phono        | Control     |
| Scanlon           | 2008 | 1216 | A      | 269 |         | Phono        | Alternative |
| Schneider         | 2000 | 1575 | A      | 217 |         | Phono+       | Both        |
| Schneider         | 1999 | 1668 | A      | 90  |         |              | Control     |
| Schwartz          | 2005 | 901  | A      | 72  | 6.41    | Phono        | Control     |
| Segers            | 2004 | 332  | A      | 36  | 5.75    | Phoneme+     | Both        |
| Senechal          | 2012 | 1524 | A      | 38  | 5.25    | Phoneme+     | Alternative |
| Seward            | 2009 | 619  | D      | 34  | 5.75    | Phono        | Control     |
| Simmons           | 2007 | 233  | A      | 66  | 5.58    | Phono+       | Alternative |
| Solari            | 2018 | 435  | A      | 90  |         | Phono        | Control     |
| Solari            | 2008 | 651  | A      | 34  | 5.50    | Phono        | Both        |
| Stevens           | 2008 | 1179 | A      | 462 |         | Phono        | Control     |
| Torgesen          | 1999 | 1669 | A      | 90  | 5.46    |              | Alternative |
| Torgeson          | 1997 | 325  | A      | 105 | 5.43    | Phono+       | Both        |
| Torgeson          | 2010 | 1147 | A      | 108 |         | Phono+       | Both        |
| Trainin           | 2014 | 1333 | A      | 53  |         | Phono+       | Alternative |
| Travis            | 1997 | 548  | D      | 64  | 6.50    | Phoneme      | Both        |

| Manuscript   |      |      |        |     |         | Intervention |             |
|--------------|------|------|--------|-----|---------|--------------|-------------|
| Author       | Year | ID   | Format | N   | Age (M) | Type         | Comparison  |
| Troia        | 2003 | 13   | A      | 37  | 9.39    | Phono        | Control     |
| Ukrainetz    | 2000 | 174  | A      | 36  | 5.48    | Phoneme+     | Control     |
| Ukrainetz    | 2009 | 181  | A      | 41  | 5.63    | Phono+       | Both        |
| Vadasy       | 2006 | 290  | A      | 67  |         | Phono+       | Control     |
| Vadasy       | 1997 | 1396 | A      | 40  | 6.54    | Phono        | Control     |
| Vadasy       | 2000 | 1671 | A      | 46  | 6.61    |              | Control     |
| Van Kleeck   | 1998 | 88   | A      | 16  | 4.04    | Phoneme      | Alternative |
| van Otterloo | 2009 | 416  | A      | 57  | 5.87    | Phono+       | Control     |
| Vanderwood   | 2014 | 195  | A      | 105 |         | Phoneme+     | Control     |
| Vaughn       | 2006 | 509  | A      | 89  | 6.60    | Phono        | Control     |
| Vaughn       | 2006 | 511  | A      | 41  | 6.59    | Phono+       | Control     |
| Wang         | 2000 | 880  | D      | 47  | 7.50    | Phono        | Both        |
| Warren       | 2009 | 1439 | D      | 10  | 5.50    | Phoneme      | Control     |
| Warrick      | 1993 | 999  | A      | 28  |         | Phono+       | Control     |
| Weiner       | 1994 | 555  | A      | 40  |         | Phoneme+     | Both        |
| Wheldall     | 2016 | 575  | A      | 240 | 5.42    | Phono+       | Control     |
| Whittaker    | 2013 | 1241 | D      | 264 |         | Phono+       | Both        |
| Wise         | 2015 | 81   | A      | 87  | 6.25    | Phoneme      | Both        |
| Wise         | 2016 | 789  | D      | 12  | 5.75    | Phono+       | Control     |
| Wise         | 1999 | 1054 | A      | 110 | 8.98    | Phoneme+     | Both        |
| Wise         | 2000 | 1573 | A      | 200 | 8.94    | Phono+       | Alternative |
| Wolff        | 2011 | 528  | A      | 112 | 9.25    | Phono+       | Control     |
| Wolff        | 2014 | 1172 | A      | 112 | 9.25    | Phono+       | Control     |
| Yeh          | 2008 | 152  | A      | 84  | 4.75    | Phono+       | Alternative |
| Yeh          | 2003 | 559  | A      | 44  | 5.08    | Phoneme+     | Alternative |
| Zoski        | 2015 | 841  | D      | 12  | 6.01    | Phono+       | Alternative |
